# Supplementary material for: Alternative DNA structure formation in the mutagenic human c-MYC promoter
Source: PubMed Central journal article supplement — Nucleic Acids Res. 2017 Feb 21;45(8):4929–43. doi: 10.1093/nar/gkx100 (PMC5416782; doi:10.1093/nar/gkx100), 2017-02-21

# Supporting Information for:

## Alternative DNA structure formation in the mutagenic human *c-MYC* promoter

Imee Marie A. del Mundo, Maha Zewail-Foote, Sean M. Kerwin and Karen M. Vasquez

|                                                                                                                                                                                         |   |
|-----------------------------------------------------------------------------------------------------------------------------------------------------------------------------------------|---|
| SI- 1. Predicted folding topologies under triplex/H-DNA-forming conditions. ....                                                                                                        | 2 |
| SI- 2. Similar gel mobilities were observed with R2 independent of DNA concentration. 3                                                                                                 |   |
| SI- 3. K <sup>+</sup> titration into known G4-DNA-forming sequences initially annealed under H-DNA-forming conditions (G4-Htel27, antiparallel G4-DNA; G4-cMyc22, parallel G4-DNA)..... | 4 |
| SI- 4. CD structures obtained at 25°C are structure-related.....                                                                                                                        | 5 |
| SI- 5. Native gel and CD spectroscopy results under Dulbecco's Phosphate Buffered Saline (DPBS) .....                                                                                   | 6 |
| SI- 6. Comparison of the temperature-dependent fluorescence of AP-A33hg under G4-DNA-forming conditions .....                                                                           | 7 |
| SI- 7. A representative denaturing gel image after chemical modification of R2-5' (primary data) under H-DNA/triplex- or G4-DNA-forming conditions .....                                | 8 |
| SI- 8. Polyacrylamide gel electrophoresis of structure-forming DNA in the presence and absence of Mg <sup>2+</sup> .....                                                                | 9 |

**SI- 1.** Predicted folding topologies under triplex/H-DNA-forming conditions.

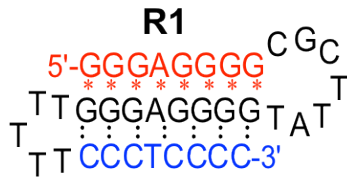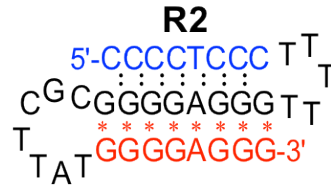

\* Hoogsteen  
: Watson-Crick

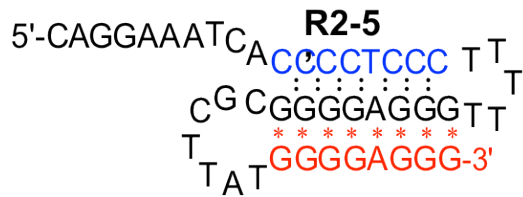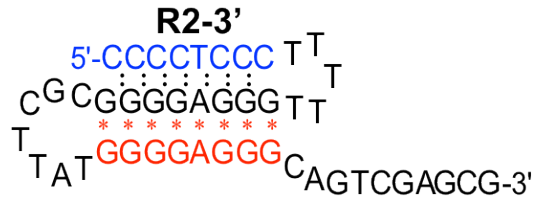

**SI- 2.** Similar gel mobilities were observed with R2 independent of DNA concentration.

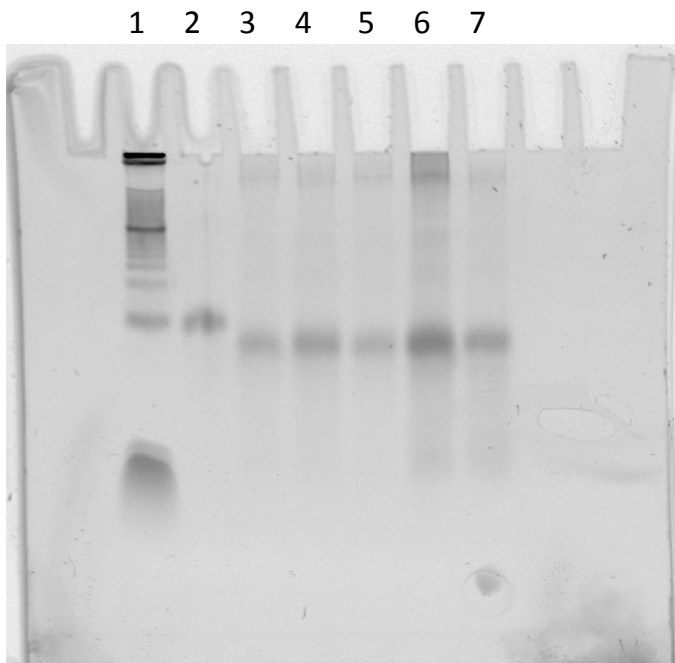

PAGE gel of R2 and R2-ino with  $Mg^{2+}$ .

- 1) MWM (10 bp ladder)
- 2) R2-ino (1  $\mu$ M)
- 3) R2 (1  $\mu$ M)
- 4) R2 (0.2  $\mu$ M)
- 5) R2 (1  $\mu$ M)
- 6) R2 (20  $\mu$ M)
- 7) R2 (99  $\mu$ M)

**SI- 3.** K<sup>+</sup> titration into known G4-DNA-forming sequences initially annealed under H-DNA-forming conditions (G4-Htel27, antiparallel G4-DNA; G4-cMyc22, parallel G4-DNA).

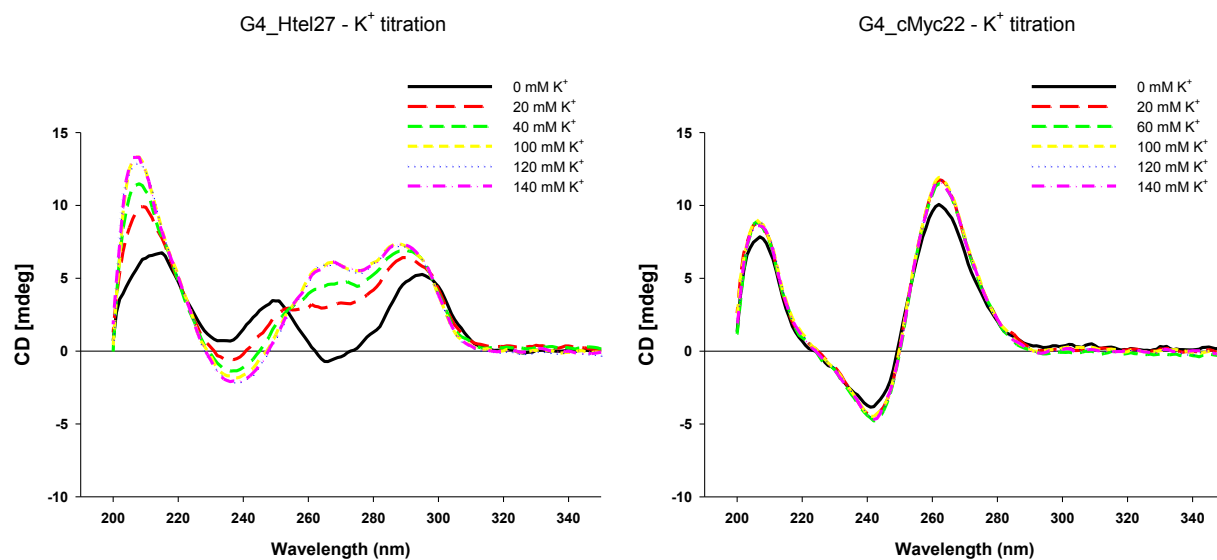

G4-Htel27 : 5'-TTA GGG TTA GGG TTA GGG TTA GGG TTA-3'

G4-cMyc22 : 5'-TGA GGG TGG GTA GGG TGG GTT A-3'

**SI- 4.** CD structures obtained at 25°C are structure-related. The structures at 90°C are similarly in random coil/denatured states.

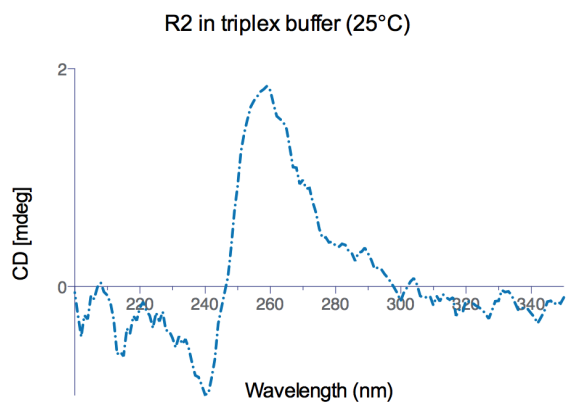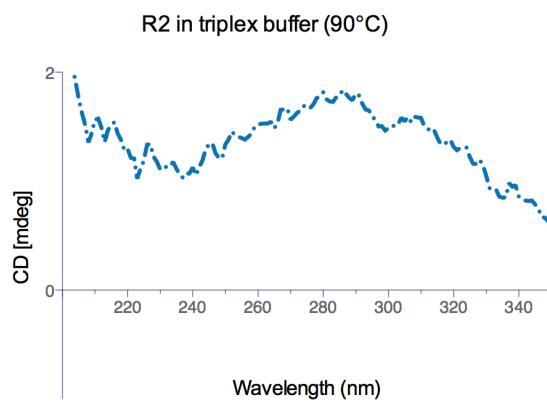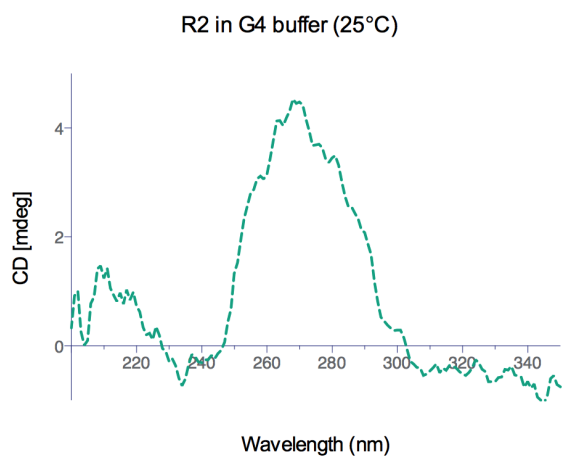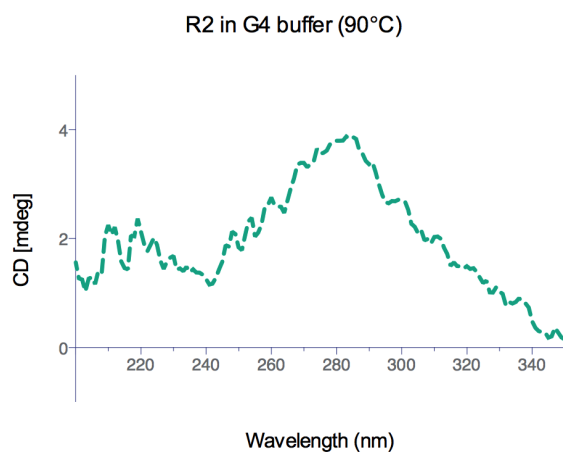

**SI- 5.** Native gel and CD spectroscopy results under Dulbecco's Phosphate Buffered Saline (DPBS) showing that motifs **A**) also folded intramolecularly and **B**) possess the triplex CD signature.

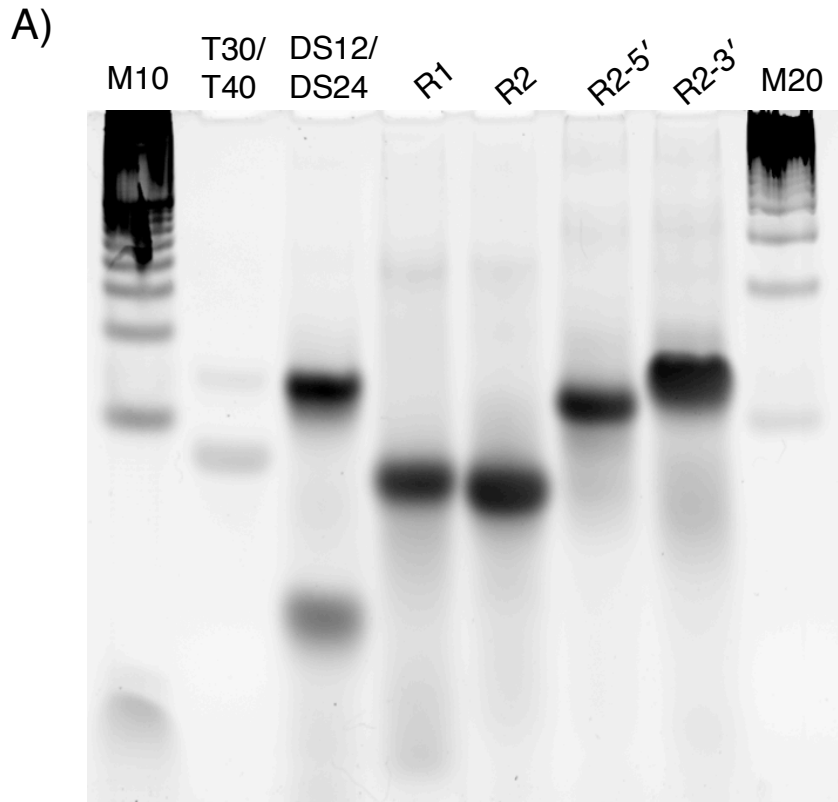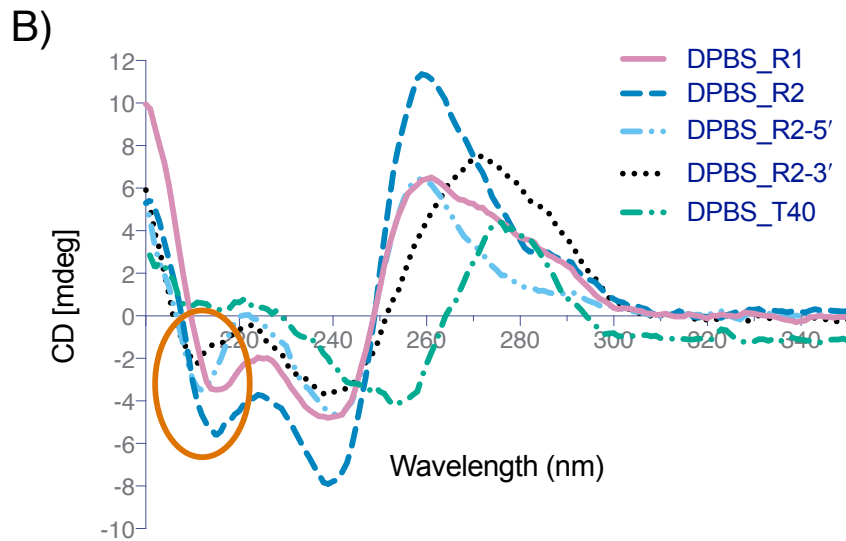

**SI- 6.** Comparison of the temperature-dependent fluorescence of AP-A33hg under G4-DNA-forming conditions with 2AP-substituted, control G4-DNA-forming sequences (AP12-myc22, AP16-myc22, AP-Tel). AP-A33hg was **A)** only 30% as intense but **B)** had a similar temperature-dependent profile as that of AP16-myc22. Intensity comparison suggests that 2AP may participate in a 2-nt loop.

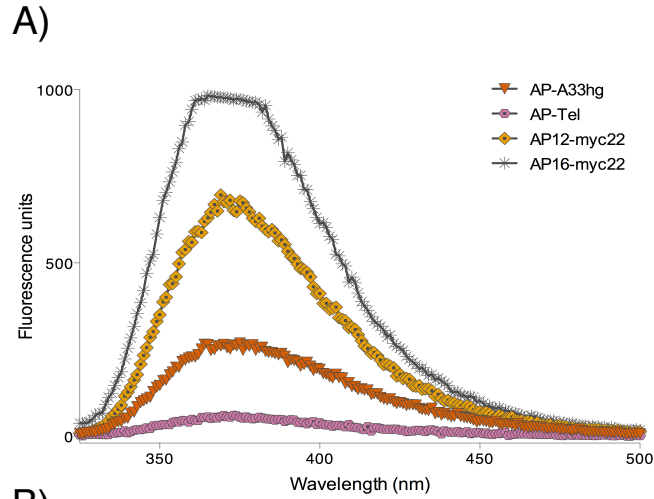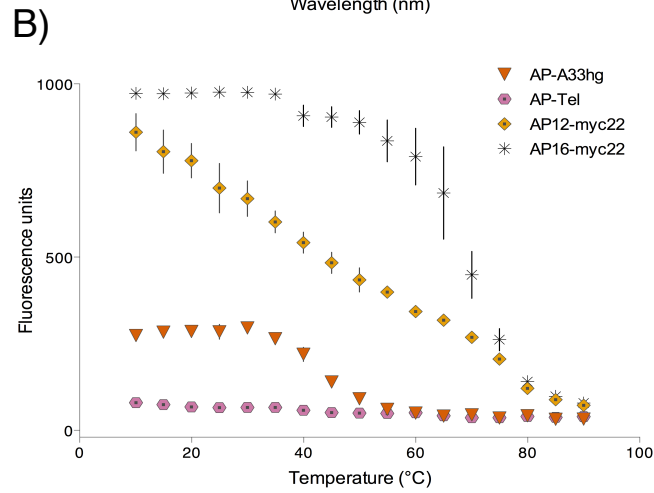

|                                                            |             |
|------------------------------------------------------------|-------------|
| <b>AP16-myc22:</b> 5'-TGA GGG T GGG TA GGG 2AP GGG TT A-3' | 1-nt loop   |
| <b>AP12-myc22:</b> 5'-TGA GGG T GGG T2AP GGG T GGG TT A-3' | 2-nt loop   |
| <b>AP-Tel:</b> 5'-GGGG TT GGGG T2AP GGGG TT GGGG-3'        | 2-4-nt loop |
| <b>AP-33hg:</b> CCCCTCCC TTTTT GGGAGGGG CGCTTAT GGGG2APGGG | 1-2-nt loop |

**SI- 7.** A representative denaturing gel image after chemical modification of R2-5' (primary data) under H-DNA/triplex- or G4-DNA-forming conditions. Lane 1=untreated; lanes 2-5=triplex conditions; lanes 6-7=G4 conditions; lanes 2 and 4 (underlined)=boiled samples. Average % protection was calculated as described in the Methods section.

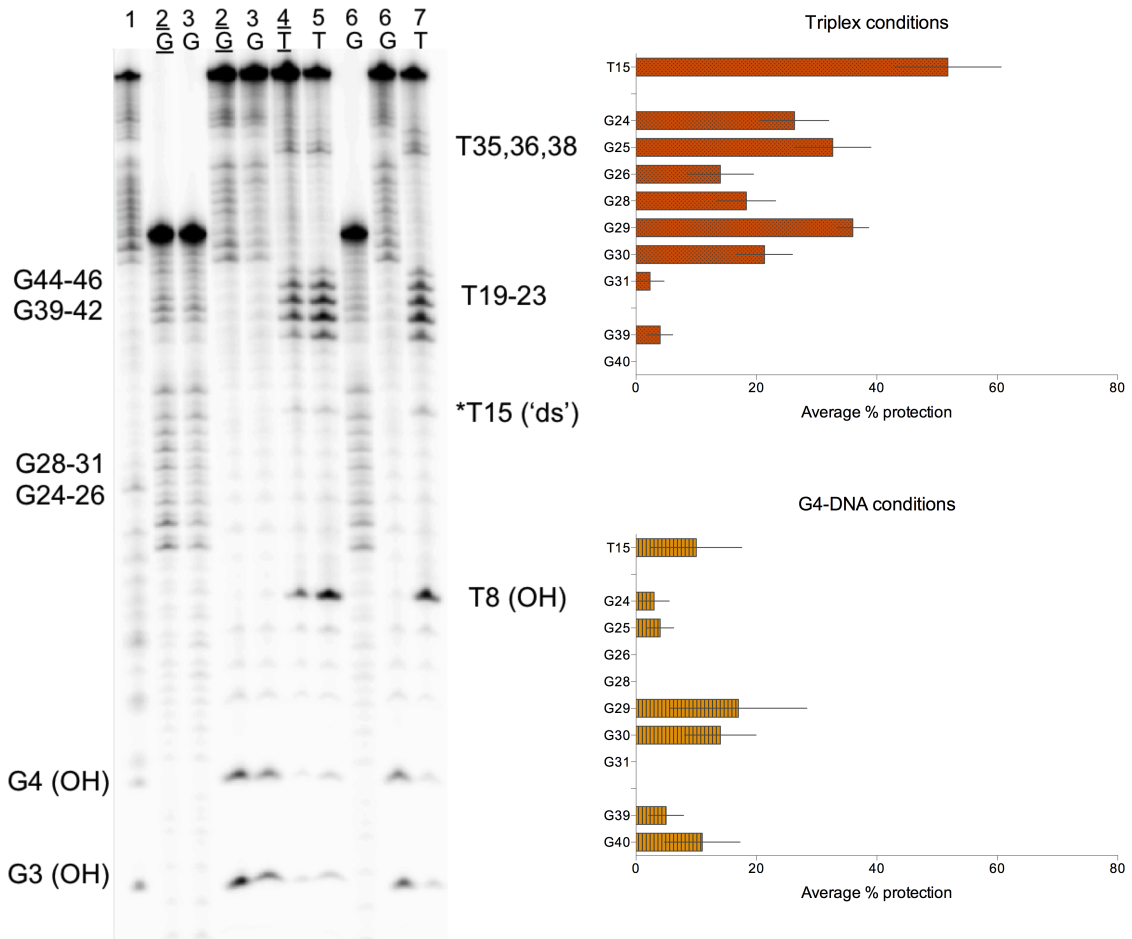



**SI- 8.** Polyacrylamide gel electrophoresis of structure-forming DNA in the **A)** presence and **B)** absence of  $Mg^{2+}$ . **C)** CD spectroscopy results show the presence of the triplex signature (negative peak at  $\sim 220$  nm) in the presence and absence of  $Mg^{2+}$ .

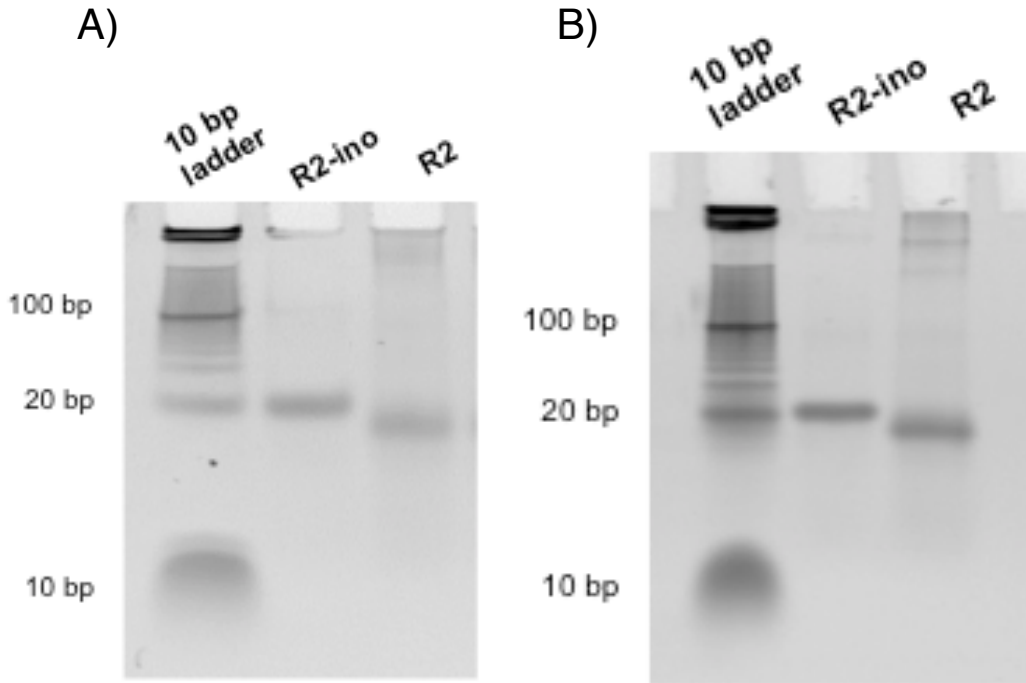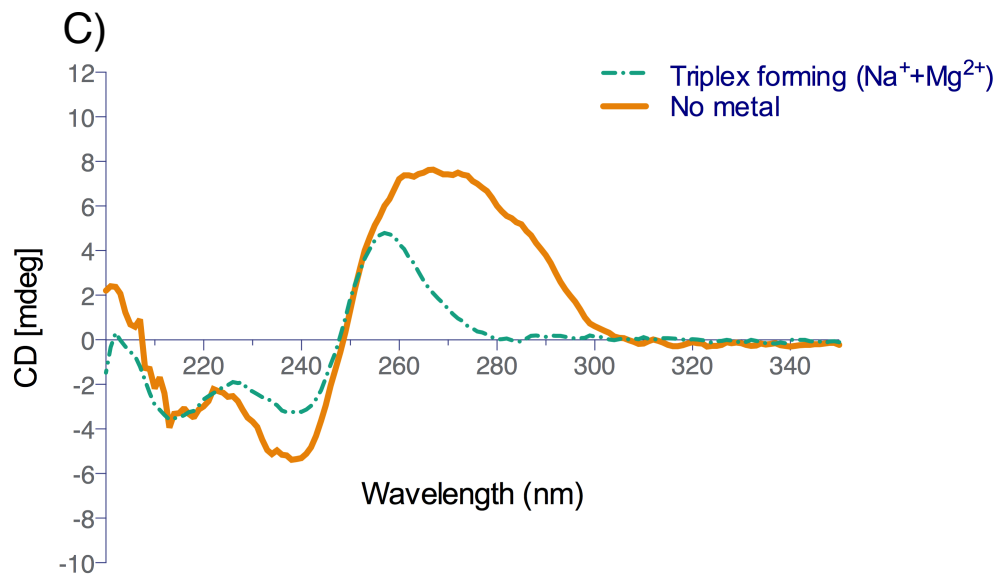

Supplement: gkx100_Supp.pdf [file gkx100_Supp.pdf]
